# Supplementary material
Source: PubMed Central journal article supplement (PMC8678393)
Supplement: NIHMS1715459-supplement-Supplementary_Materials__figures__tables.pdf [file NIHMS1715459-supplement-Supplementary_Materials__figures__tables.pdf]

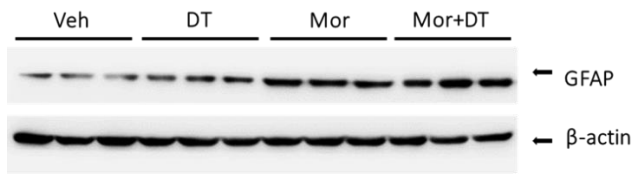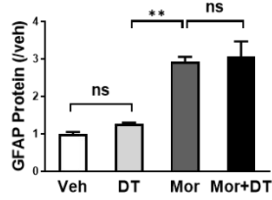

**Supplementary Figure. Microglial ablation in DTR transgenic mice did not affect morphine-induced astrocytes reaction.** Immunoblotting analysis of GFAP protein was performed on the spinal cord of CD11b-DTR transgenic mice at day 7 (DT and morphine administration paradigm shown in Fig.1B), treated with vehicle (Veh), Diphtheria toxin (DT), morphine (Mor) or Mor+DT (left) (\*\*,  $p < 0.01$ ).
